1 **Factors associated with adherence to HIV testing guidelines among HIV negative female sex**  
2 **workers in Kampala Uganda.**

3 Lydia Atuhaire<sup>1,2</sup>, Constance S Shumba<sup>3,4</sup>, Lovemore Mapahla<sup>1</sup>, Innocent Maposa<sup>5</sup>, Peter S Nyasulu<sup>1,6</sup>

4 <sup>1</sup>Division of Epidemiology & Biostatistics, Faculty of Medicine and Health Sciences, Stellenbosch  
5 University, Cape Town, South Africa.

6 <sup>2</sup>Makerere University/UVRI Infection and Immunity Research Training Programme, Entebbe, Uganda

7 <sup>3</sup>School of Nursing and Midwifery, Aga Khan University, Nairobi, Kenya.

8 <sup>4</sup>Department of Population Health, Aga Khan University, Nairobi, Kenya

9 <sup>5</sup>Division of Epidemiology & Biostatistics, School of Public Health, Faculty of Health Sciences  
10 University of the Witwatersrand, Johannesburg

11 <sup>6</sup>School of Public Health, Faculty of Medicine and Health Sciences, University of the Witwatersrand,  
12 Johannesburg, South Africa

13 **\*Email: [latuhaire@gmail.com](mailto:latuhaire@gmail.com);**

14

15

16

17

18

19

## 20 **Abstract**

### 21 **Background**

22 Frequent HIV testing at intervals of every three to six months is recommended among HIV negative  
23 female sex workers as the first entry point to HIV prevention and treatment. In this study, we examined  
24 the extent to which HIV negative female sex workers adhere to the testing guidelines by measuring the  
25 frequency of testing in the last 12 months and identified associated factors among female sex workers  
26 in Kampala Uganda.

### 27 **Methods**

28 We conducted a cross-sectional study using structured questionnaires. Using equal probability selection  
29 method, 12 hotspots were selected, and 200 participants interviewed based on proportional allocation  
30 in each hotspot. We used descriptive statistics to describe female sex workers' characteristics, and  
31 multivariable logistic regression model to determine the factors associated with their adherence to the  
32 HIV testing guidelines. Adherence to the HIV testing guidelines was defined as having tested three or  
33 more times in the last 12 months. Factors with p-value  $\leq 0.05$  significance level were considered  
34 statistically significant.

### 35 **Results**

36 From the 200 study participants, 43% were aged 25-30 years, joined sex work between the ages of 18  
37 to 24 years, 49% had attained primary and 41% secondary school respectively. 88% reported HIV  
38 testing status, of which 56% had tested three or more times in the 12 months preceding the survey.  
39 Attaining secondary education, was independently associated with adherence to the HIV testing  
40 guidelines (OR 1.86, 95% CI: 1.01 - 3.44,  $p=0.047$ ). Those that had tested for STIs in the last three  
41 months (OR= 2.13, 95% CI: 0.95 - 4.74,  $p=0.065$ ) and accessed HIV testing in a drop-in centre (OR=  
42 5.90, 95% CI: 0.71 - 49.1,  $p=0.101$ ) had higher odds of adhering to the HIV testing guidelines

### 43 **Conclusion**

44 This study found suboptimal adherence to the HIV testing guidelines among HIV negative female sex  
45 workers. Interventions such as HIV self-testing that improve access to, and frequency of HIV testing  
46 need to be taken to scale. There is need for rigorous behaviour change program evaluation to continually

47 refine understanding of the message mix, to ensure simplified and easy to comprehend awareness  
48 messages are designed for female sex workers with no formal education.

49

## 50 **Introduction**

51 Globally, female sex workers (FSWs) are recognised as a population that is at increased risk of acquiring  
52 HIV infection. As such this population is a critical target for frequent HIV testing, an essential  
53 component of combination HIV prevention interventions (1). Early HIV testing is the first entry to HIV  
54 prevention and treatment which places an emphasis on the high risk groups in the population such as  
55 FSWs (2). The World Health Organization (WHO) recommends frequent HIV testing at intervals of  
56 every three months to six months among FSWs, and countries are at liberty to adapt a period within that  
57 timeframe that suits their population and epidemic (3). The WHO rolled out guidelines and  
58 implementation approaches to be used to support access to client centred routine HIV testing, care and  
59 prevention services to reduce continued transmission of HIV infection (3, 4). Countries in sub-Saharan  
60 Africa adapted the WHO HIV testing policies released in 2015 and in Uganda, specific testing  
61 guidelines released in 2016 indicate that FSWs should test every three months (5, 6)

62 Various approaches have been operationalised and are being implemented to improve routine HIV  
63 testing among FSWs. Such interventions include: integration of HIV testing services (7) with other  
64 health services such as family planning (8), community based testing within the sex work hotspots in  
65 Uganda and Kenya; and HIV testing in drop- in- centres in the Democratic Republic of Congo (9-11),  
66 community mapping for testing in South Africa (12) as well as several other community-based testing  
67 interventions within the broader sub Saharan Africa region (13-16). Successes of these interventions  
68 have been reported such as ‘sex work hotspot-based testing’ which has been shown to have potential  
69 for reducing undiagnosed HIV from 71.6% to 20.2% among FSWs and young women (11). Despite  
70 these successes, the desired uptake of routine HIV testing among FSWs is still suboptimal (17, 18) .

71 A study conducted in Benin (19) reported a 40% HIV testing uptake among FSW in the last three  
72 months, and only 21% had tested in the last 3 to 6 months. A cross-sectional survey that measured HIV  
73 testing at different time points among FSWs in Mombasa, Kenya found that 45% were testing for HIV

74 infection every 3 months, 15% every 6 months while only 12% had tested in the last 1 to 12 months  
75 (20). A few studies that found high levels of testing among FSWs, that is, 89.2% (21) and 88% (20)  
76 used a different measuring approach. The investigators measured longer time periods between testing,  
77 that is, at 12 months, and ever tested in a lifetime.

78 Consistent with other countries in sub-Saharan Africa, the uptake of routine HIV testing among FSWs  
79 is low in Uganda. A previous study conducted among FSWs in Kampala showed that only 53% of  
80 FSWs had ever tested for HIV, and of these, 16% had tested in the preceding 12 months (22). A cross-  
81 sectional survey conducted in 2019 which assessed FSWs preference and uptake of different  
82 community-based HIV testing service delivery models found that 86% FSWs had taken an HIV test in  
83 the last 12 months (9). A related study that assessed HIV screening practices among FSWs in the four  
84 regions of Uganda showed 95% had ever tested for HIV and 67% had tested for HIV two or more times  
85 in the last 12 months preceding the survey (23).

86 HIV testing among FSWs is propagated by several factors which have previously been reported to  
87 influence routine HIV testing. These include behavioural factors such as high alcohol intake, drug use,  
88 and high mobility of FSWs in search of new customers (18, 20, 21). Further, there are structural factors  
89 such as stigma and discrimination, violence and violation of rights (24, 25), and health system factors  
90 such as the limited availability of trained health workers to provide friendly services, inadequate  
91 friendly testing centres due to conflicting hours of testing with FSWs schedules of work. This acts as a  
92 catalyst for FSWs to be reluctant to seek routine HIV testing services (26-28). Programs that have  
93 attempted to understand the contextual issues that hinder access to HIV services among FSWs have led  
94 to scale up of comprehensive and targeted FSWs approaches. These program strategies have also  
95 registered great success in improving access to the HIV services which include routine HIV testing and  
96 early diagnosis of HIV infection (29). For example, the enhanced peer outreach approach that targeted  
97 key populations including FSWs in Cote d'Ivoire, the Democratic Republic of Congo, and Burundi,  
98 successfully identified and offered HIV testing to the hard-to-reach FSWs. This approach led to an  
99 increase in diagnoses of new HIV infection among FSWs, and improved linkage to care and treatment  
100 (29, 30).

101

102 Although studies in sub Saharan Africa and in particular Uganda (22, 23) have studied uptake of HIV  
103 testing, the majority have focused at examining the history of ever tested, and how proximate the tests  
104 were (18, 21, 24, 26, 31). These studies did not assess the extent FSWs adhered to the HIV testing  
105 guidelines (3). Limited data are available regarding the frequency and factors associated with routine  
106 HIV testing among FSWs in Uganda. This study therefore examines the extent to which HIV negative  
107 FSWs adhere to the testing guidelines by measuring the frequency of testing in the previous year. It also  
108 assesses the factors associated with adherence to HIV testing guidelines among HIV negative FSWs.

109

## 110 **Methods**

### 111 **Ethics consideration**

112 The study was approved by the Institutional Review Boards of the Uganda Virus Research Institute  
113 (UVRI) reference number GC/12719/08/723, and Ethics Committee of Faculty of Medicine and Health  
114 Sciences of Stellenbosch University reference number S19/05/088, and Uganda National Council of  
115 Science and Technology reference number HS-2665. All participants were given detailed information  
116 about the study and were informed that their participation was voluntary and that they had the right to  
117 withdraw from the interviews at any time. Participants also provided verbal informed consent as  
118 opposed to written consent, in line with the guidance from the Uganda National Council of Science and  
119 Technology (reference number HS-2665) on conducting research among key populations.

120

### 121 **Study design**

122 We conducted a cross-sectional study using structured questionnaires. We used simple random  
123 sampling to select the hotspots and non-probability sampling methods specifically voluntary response  
124 sampling to select participants, we assessed adherence to the HIV testing guidelines for FSWs by  
125 determining the number of times FSWs tested for HIV in the last 12 months preceding the study

126

### 127 **Study setting**

128 We conducted the study at established sex work hotspot areas in the five administrative divisions of  
129 Kampala city. We defined these sex work hotspots as geographical locations where the actual sex work  
130 trade is concentrated such as streets, lodges, and bars. Kampala is the capital and largest city in Uganda.  
131 The city is divided into five administrative divisions from from where the sample was drawn, namely,  
132 Nakawa, Makindye, Kampala Central, Rubaga and Kawempe divisions. We selected Kampala because  
133 it is a highly active and economically vibrant business centre and attracts potential customers for FSWs  
134 due to financial accessibility. The city has many truck drivers, that transport commercial goods across  
135 Kampala from neighbouring countries of Rwanda, Democratic Republic of the Congo, Tanzania,  
136 Kenya, Burundi, Rwanda, and South Sudan.

### 137 **Study population**

138 The study population consisted of FSWs aged  $\geq 18$  years who operated in any of the sex work hotspots  
139 within any of the five administrative divisions of Kampala at the time of the study. We recruited FSWs  
140 who were HIV negative only based on self-report. We defined FSWs as individuals who offer sex in  
141 exchange for money or other financial or material benefits as their main source of income generation  
142 or supplements other primary source of income, with sex work as an additional source of income. We  
143 recruited individuals engaged in this trade and had been operating within the last 12 months preceding  
144 the survey.

145

### 146 **Variable measurements**

147 The main outcome measure was adherence to the HIV testing guidelines for FSWs. Adherence was  
148 defined as having tested for HIV three times or more within the last 12 months. The exposure variables  
149 were demographic and social behavioural characteristics including age, education level, marital status,  
150 housing status, and if the FSW had other job other than sex work. The social behavioural exposure  
151 variables are indicated in table 2.

152

### 153 **Sample size and sampling procedure**

154 We first obtained a list of sex work hotspots with an estimated population of FSWs from the Infectious  
155 Diseases Institute. This institute works with FSW network organizations in Kampala hence has more  
156 accurate data of FSWs population in the city. There were 327 mapped hotspots with an estimated total  
157 number of 11,558 FSWs operating in those hotspots. Using equal probability selection method of the  
158 hotspots, 12 sites were randomly selected from the five divisions, and these yielded a total of 6,761  
159 FSWs. Due to resource constraints, out of the 6,761 FSWs in 12 hotspots, a final sample of 200 was  
160 selected basing on proportional allocation in each hotspot.

161

### 162 **Participant recruitment**

163 We approached the FSWs network organisations, introduced the study, and asked them to help us  
164 identify the FSW peer leaders from the selected sex work hotspots. We conducted an introductory  
165 session with the FSW peer leaders and oriented them on to the objectives of the study, and all issues  
166 related to ethical conduct of the survey. We emphasized the confidentiality, safety, privacy, and  
167 voluntary nature of their participation in the study. After orientation to the study, the peer leaders  
168 approached various FSWs and introduced them to the study. Those who expressed willingness to  
169 participate were allowed to identify a mutually agreed private and safe place for a detailed interview.  
170 This recruitment process was conducted on a first come, first served basis until the number for each  
171 hotspot was reached.

### 172 **Data collection procedures**

#### 173 **Validation of tools and data quality assurance**

174 We developed a structured questionnaire and consenting documents based on the empirical literature,  
175 and prior experience of the research team in HIV programming. From the comprehensive review of  
176 literature, potential factors that influence adherence to the HIV testing guidelines were categorized  
177 under different domains. The domains were social behavioral practices, health seeking behavior, HIV  
178 testing, availability and access to HIV prevention services, risk perception and stigma and  
179 discrimination and depression tendencies. After the key domains were identified, relevant questions  
180 relating to each domain were developed by considering Uganda and FSWs contexts. Accordingly, 98

181 questions assessing all the domains on adherence to testing guidelines were initially developed. Two  
182 members of the team with expert knowledge in HIV prevention did content validation of the tool to  
183 select the most relevant and reduced the total number to 60. The team also assessed clarity of the  
184 instrument. Discussion on each question with two people of non-medical background was also made to  
185 further ensure clarity and face validity of the instrument.

186 The tools were translated to Luganda, a common local language in Kampala and back translated into  
187 English. The questionnaire was piloted in a non-study sex work hotspot in Wakiso district neighboring  
188 Kampala city. A total of 12 FSWs were enrolled in the pilot testing process. The pilot testing of the  
189 questionnaire helped to determine the limitations of the survey regarding the format of the questions  
190 clarity, appropriate wording, and the estimate time of completion per each questionnaire. The pilot  
191 testing was stopped after the observed limitations in the questionnaire were corrected.

#### 192 **Data collection**

193 Data were collected using a hard copy structured questionnaire administered by interviewers in one-on-  
194 one interviews. A research team with experience in quantitative data collection was recruited and trained  
195 to enhance their knowledge in quantitative data collection practices and research ethics, so that they  
196 could adhere to the protection of participant's privacy, confidentiality, safety, and all other ethics  
197 standards. FSWs who provided verbal informed consent were interviewed in a private place mutually  
198 agreed on with the researcher. Data collection was done between November to December 2020.

#### 199 **Data management**

200 Data quality checks were conducted daily during field monitoring by crosscheck discrepancies, and  
201 completeness of data on all variables. We conducted real time form review and corrected missing or  
202 wrongly captured data while still in the field when it was still possible to access participants. Data were  
203 entered in Research Electronic Data Capture (REDCap), an online data management tool for surveys  
204 which helps to quickly find discrepancies and errors in the collected data (32). Data were exported into  
205 Stata version 15.0 where further checking for errors, outliers, and completeness were conducted.

#### 206 **Statistical analysis:**

207 The frequencies and corresponding percentages were used to describe categorical variables. Only  
208 complete cases were used in the analysis of the dataset. Univariate logistic regression models were done



209 for each independent variable and the binary study outcome, that is, adherence to HIV testing guidelines  
210 among HIV-negative female sex workers. All variables from univariate models, which had a p-value of  
211 0.2 were included in subsequent multivariable model. Multivariate logistic regression model was done  
212 starting with the variable with the strongest relationship with adherence to HIV testing guidelines  
213 among female sex workers. Other independent variables were added to this model one after another  
214 using forward stepwise method. The added variable would be dropped if it weakens the relationship  
215 between the first variable and the outcome. The stepwise logistic regression model was used to  
216 automatically select a reduced number of independent variables to build the best performing logistic  
217 regression model. The effect measure odds ratio was used to assess the relationship with adherence to  
218 the testing guidelines after adjusting for other covariates. Adjusting for other covariates was meant to  
219 take care of possible confounding by one independent variable on the relationship of another  
220 independent variable and study outcome, adherence. Factors with p-value  $\leq 0.05$  significance level were  
221 considered statically significant.

222

## 223 **RESULTS**

### 224 **Socio-demographic characteristics of the study participants**

225 Most participants were aged 25-30 years (43%; n=85, and nearly (51%; n=100) joined the sex work  
226 industry around the age of 18 to 24 years. The main source of income for this study sample was sex  
227 work (64%; n=128). Majority were living in their own or rented homes (89%; n=171), had children  
228 (86%; n=171) and most of them had been to primary school (49%; n=97) and secondary school (41%;  
229 n=82) respectively (Table 1).

230

231 **Table 1: Socio-demographic characteristics of the study participants**

| <b>Socio-demographic characteristics</b> | <b>Frequency n=200</b> | <b>Percentage</b> |
|------------------------------------------|------------------------|-------------------|
| <b>Location</b>                          |                        |                   |
| Kampala Central                          | 60                     | 30.0              |
| Nakawa                                   | 22                     | 11.0              |
| Kawempe                                  | 62                     | 31.0              |
| Rubaga                                   | 37                     | 18.5              |
| Makindye                                 | 19                     | 9.5               |
| <b>Age group</b>                         |                        |                   |
| 18-24                                    | 58                     | 29.0              |
| 25-30                                    | 85                     | 42.5              |
| 31-49                                    | 57                     | 28.5              |
| <b>Age at sex work start</b>             |                        |                   |
| 10-17                                    | 28                     | 14.2              |
| 18-24                                    | 100                    | 50.8              |
| 25-45                                    | 69                     | 35.0              |
| Missing                                  | 3                      | 1                 |
| <b>Education</b>                         |                        |                   |
| None                                     | 18                     | 9.0               |
| Primary                                  | 97                     | 48.5              |
| Secondary                                | 82                     | 41.0              |
| Post-Secondary                           | 3                      | 1.5               |
| <b>Marital Status</b>                    |                        |                   |
| Single/Never married                     | 44                     | 22.0              |
| Married and cohabiting                   | 18                     | 9.0               |
| Separated/Divorced/Widowed               | 138                    | 69.0              |
| <b>Has children</b>                      |                        |                   |
| No                                       | 28                     | 14                |
| Yes                                      | 171                    | 85.5              |
| Missing                                  | 1                      | 0.5               |
| <b>Other Job other than sex work</b>     |                        |                   |
| No                                       | 128                    | 64                |
| Yes                                      | 71                     | 35.5              |
| Missing                                  | 1                      | 0.5               |
| <b>Housing status n=124</b>              |                        |                   |
| Own/rented house                         | 178                    | 89.0              |
| Housed by relatives/friends              | 18                     | 9.0               |
| No shelter                               | 4                      | 2.0               |

232

233 **Adherence to the HIV testing guidelines and associated characteristics.**

234 As shown in table 2, (89.5%; n= 179) of the HIV negative participants reported that they tested for HIV  
 235 infection in the last twelve months, (56%; n=100) of these had tested  $\geq 3$  times. The proportion of  
 236 adherence to the HIV testing guidelines were significantly higher among the HIV-negative FSWs who  
 237 attained secondary education than among the FSWs who had obtained primary or had no education at

238 all (53% vs. 37%, p=0.03). Of the 18 FSWs in the study who received a complete FSWs minimum  
239 health package in the past 3 months, they all adhered to the testing guidelines. (100% vs 0% p=0.001).

240 **Table 2: Characteristics of FSWs by adherence to the HIV testing guidelines status**

| Variable                                                            | Non adherence<br>N (%) | Adherence<br>N (%) | p-value |
|---------------------------------------------------------------------|------------------------|--------------------|---------|
| <b>Age group (Age n=179)</b>                                        |                        |                    |         |
| 18-24                                                               | 22(27.9)               | 33(33.0)           | 0.398   |
| 25-30                                                               | 38(48.1)               | 38(38.0)           |         |
| 31-49                                                               | 19(24.1)               | 29(29.0)           |         |
| <b>Education n=179</b>                                              |                        |                    |         |
| None                                                                | 30(37.9)               | 32(32)             | 0.03    |
| Primary                                                             | 20(25.3)               | 15(15)             |         |
| ≥Secondary                                                          | 29(36.7)               | 53(53)             |         |
| <b>Marital Status* n=179</b>                                        |                        |                    |         |
| Single/Never married                                                | 15(19.0)               | 26(26.0)           | 0.512   |
| Married/cohabiting                                                  | 9(11.4)                | 9(9.0)             |         |
| Separated/Divorced/Widowed                                          | 55(69.6)               | 65(65.0)           |         |
| <b>Other Jobs n=178</b>                                             |                        |                    |         |
| No                                                                  | 50(63.3)               | 63(63.6)           | 0.962   |
| Yes                                                                 | 29(36.7)               | 36(36.4)           |         |
| <b>Housing status n=124</b>                                         |                        |                    |         |
| Own/rented house                                                    | 67(84.8)               | 91(91.0)           | 0.296   |
| Housed by relatives/friends                                         | 11(13.9)               | 7(7.0)             |         |
| No shelter                                                          | 1(1.3)                 | 2(2.0)             |         |
| <b>Condom use by FSW n=179</b>                                      |                        |                    |         |
| Consistence                                                         | 10(12.7)               | 11(11.0)           | 0.732   |
| Inconsistence                                                       | 69(87.3)               | 89(89.0)           |         |
| <b>Drug use (Ever used) n=176</b>                                   |                        |                    |         |
| No                                                                  | 58(74.4)               | 64(65.3)           | 0.196   |
| Yes                                                                 | 20(25.6)               | 34(34.7)           |         |
| <b>Regular medical check-up n=179</b>                               |                        |                    |         |
| No                                                                  | 59(74.7)               | 64(64)             | 0.126   |
| Yes                                                                 | 20(25.3)               | 36(33)             |         |
| <b>Knowledge on testing guidelines n=178</b>                        |                        |                    |         |
| No                                                                  | 24(30.8)               | 40(40)             | 0.203   |
| Yes                                                                 | 54(69.2)               | 60(33)             |         |
| <b>Most recent HIV testing n=179</b>                                |                        |                    |         |
| No                                                                  | 57(72.1)               | 73(73)             | 0.899   |
| Yes                                                                 | 22(27.8)               | 27(27)             |         |
| <b>Social support for HIV test n=178</b>                            |                        |                    |         |
| Yes                                                                 | 36(45.6)               | 48(48.5)           | 0.699   |
| No                                                                  | 43(54.4)               | 51(51.5)           |         |
| <b>Receipt of minimum health package in last 3 months<br/>n=179</b> |                        |                    |         |

|                                                       |          |          |         |
|-------------------------------------------------------|----------|----------|---------|
| No                                                    | 79(100)  | 82(82.0) | P<0.001 |
| Yes                                                   | 0(33)    | 18(18.0) |         |
| <b>HIV testing awareness campaign n=179</b>           |          |          |         |
| No                                                    | 12(15.2) | 10(10.0) | 0.294   |
| Yes                                                   | 67(84.8) | 90(90.0) |         |
| <b>Concerns about stigma and discrimination n=178</b> |          |          |         |
| High                                                  | 31(39.7) | 36(36.0) | 0.567   |
| Moderate                                              | 20(25.6) | 33(33.0) |         |
| Low                                                   | 27(34.6) | 31(31.0) |         |
| <b>FSW risk perception to HIV risk n=176</b>          |          |          |         |
| No risk                                               | 11(14.5) | 14(14.0) | 0.747   |
| low risk                                              | 33(43.4) | 49(49.0) |         |
| ≥High risk                                            | 32(42.1) | 37(37.0) |         |

241

## 242 **Factors that facilitated adherence to the HIV testing guidelines**

243 There were several factors that participants highlighted as potential motivating factors. The desire to  
 244 know their HIV status and seek treatment early should they be found to be HIV positive was prime  
 245 (41%; n=111). Other (11%; n=32) cited easy accessibility to testing services since the testing services  
 246 were brought nearer to their communities; while (13%; n=37) indicated that their perception of being  
 247 at a high risk of HIV infection due to condom bursting during sexual intercourse prompted them to seek  
 248 HIV testing. Furthermore, (10%; n=27) of the participants indicated that illnesses were another reason  
 249 that led to take up regular HIV testing (**Figure 1**).

250

251

252

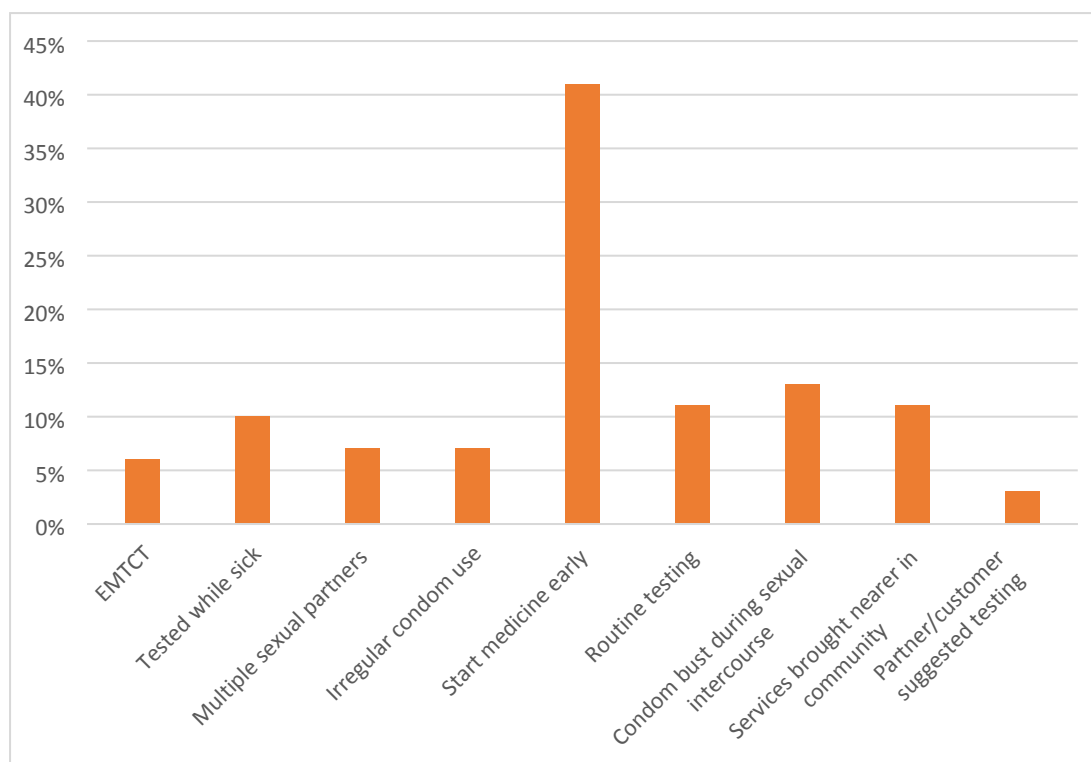

253  
254 **Figure 1:** Factors that facilitated adherence to the HIV testing guidelines  
255

#### 256 **Factors associated with non-adherence to the HIV testing guidelines**

257 Approximately (22%; n= 40) FSWs reported challenges to routine HIV testing including perception of  
258 risk of HIV infection and fear of knowing their HIV status (43%; n=17), lack of transport to visit a  
259 health facility for regular HIV testing (28%; n=11), and fear of being stigmatized by the health workers  
260 (13%; n=5). Although, (64% n=114) of the FSWs were aware about the testing guidelines, out of those  
261 who knew the guidelines, only (60%; n=60) were adherent, (48% n=26) of the participants indicated  
262 they were consistently using condoms and did not see the reason of routine testing, and that the testing  
263 centres opening hours are not work friendly to FSWs (22%; n=12) and others were just reluctant to test  
264 due to unknown reasons (18%; n=10) (**Figure 2**).

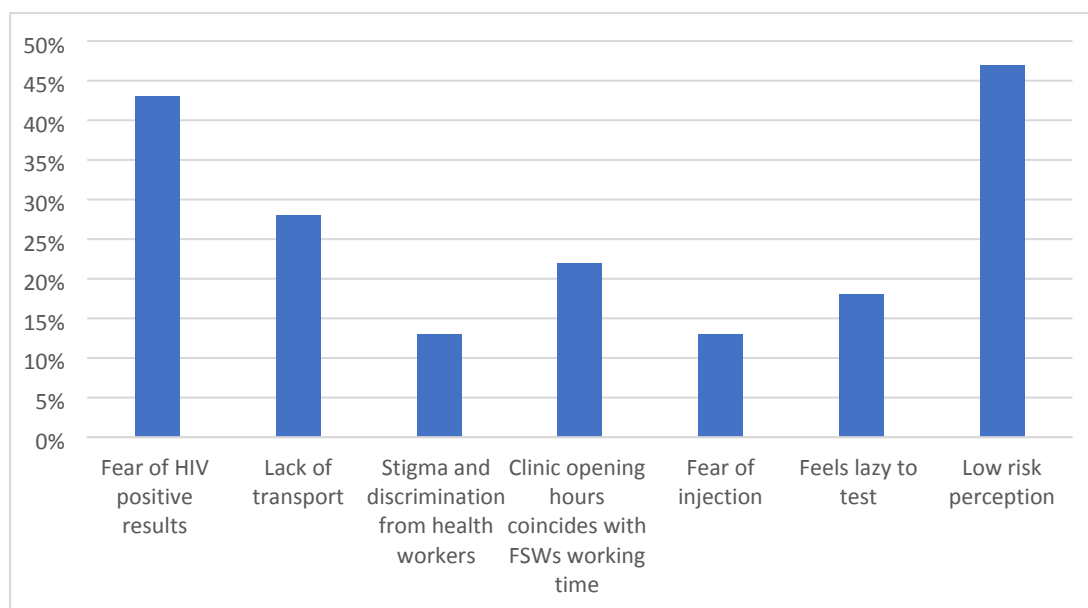

265  
266 **Figure 2:** Factors that facilitated non-adherence to the HIV testing guidelines  
267

268 **Univariate Analysis of factors associated with adherence to the HIV testing guidelines among**  
269 **HIV-negative FSW**

270 On univariate analysis (Table 3) participants who had attained secondary education were more likely to  
271 adhere to the testing guidelines than those that had attained primary or no education at all (OR=1.94,  
272 95% CI: 1.06 - 3.55, p=0.031). Those that had tested for STI in the last three months (OR= 2.13, 95%  
273 CI: 0.95 - 4.74, p=0.065 as well as those who had accessed HIV testing in a drop-in centre (OR= 5.90,  
274 95% CI: 0.71 - 49.1, p=0.101) had higher odds of adhering to the testing guidelines

275 **Table 3:** Univariate analysis of factors associated with adherence to the HIV testing guidelines

| Factors                    | Univariate Analysis<br>OR (95% CIs) | p-value |
|----------------------------|-------------------------------------|---------|
| <b>Age</b>                 |                                     |         |
| 8-24                       | 1                                   |         |
| 25-30                      | 0.67(0.33;1.35)                     | 0.258   |
| 31-49                      | 1.02(0.46;2.24)                     | 0.966   |
| <b>Education</b>           |                                     |         |
| Primary                    | 1                                   |         |
| ≥Secondary                 | 1.94 (1.06; 3.55)                   | 0.031   |
| <b>Marital status</b>      |                                     |         |
| Single/Never married       | 1                                   |         |
| Married and cohabiting     | 0.58(0.19;1.77)                     | 0.336   |
| Separated/Divorced/Widowed | 0.68(0.33;1.41)                     | 0.304   |
| <b>Another Paying job</b>  |                                     |         |
| No                         |                                     |         |

|                                        |                   |       |
|----------------------------------------|-------------------|-------|
| Yes                                    | 0.99(0.53;1.82)   | 0.962 |
| <b>Condom use</b>                      |                   |       |
| No                                     |                   |       |
| Yes                                    | 1.17(0.47;2.92)   | 0.732 |
| <b>Drug use</b>                        |                   |       |
| No                                     |                   |       |
| Yes                                    | 1.54(0.80;2.97)   | 0.197 |
| <b>Used alcohol</b>                    |                   |       |
| No                                     |                   |       |
| Yes                                    | 1.26(0.61;2.60)   | 0.535 |
| <b>STI screening last three months</b> |                   |       |
| No                                     |                   |       |
| Yes                                    | 2.13(0.95;4.74)   | 0.065 |
| <b>Routine medical check-up</b>        |                   |       |
| No                                     |                   |       |
| Yes                                    | 0.86 (0.74;1.02)  | 0.076 |
| <b>Knowledge of testing guidelines</b> |                   |       |
| No                                     |                   |       |
| Yes                                    | 1.00 (0.88; 1.14) | 0.989 |
| <b>Housing status</b>                  |                   |       |
| Own/rented house                       | 1                 |       |
| Housed by relatives/friends            | 0.40 (0.14; 1.13) | 0.084 |
| No shelter                             | 1.27 (0.11; 14.5) | 0.847 |
| <b>HIV testing awareness</b>           |                   |       |
| No                                     |                   |       |
| Yes                                    | 1.61(0.66; 3.95)  | 0.297 |
| <b>Risk perception to HIV risk</b>     |                   |       |
| No risk                                | 1                 |       |
| low risk                               | 1.17(0.47;2.88)   | 0.738 |
| ≥High risk                             | 0.91(0.36;2.28)   | 0.838 |
| <b>Social support</b>                  |                   |       |
| No                                     |                   |       |
| Yes                                    | 0.89(0.50;1.61)   | 0.699 |
| <b>Use of drop-in centres</b>          |                   |       |
| No                                     |                   |       |
| Yes                                    | 5.90 (0.71; 49.1) | 0.101 |

276

277 **Multivariate analysis of factors associated with adherence to the HIV testing guidelines among**

278 **FSW**

279 In the multivariate logistic regression analysis (Table 4), attaining a secondary education, was

280 independently associated with adherence to the HIV testing guidelines, after adjusting for use

281 of drop-in centres (DIC) and routine medical check-up (OR: 1.86, 95% CI: 1.01 - 3.44,  
282 p=0.047).

283 **Table 4;** Multivariate analysis of factors associated with adherence to the HIV testing guidelines  
284 among FSW

| <b>Factors</b>                  | <b>Multivariate Analysis<br/>OR (95% CIs)</b> | <b>p-value</b> |
|---------------------------------|-----------------------------------------------|----------------|
| <b>Age</b>                      |                                               |                |
| 8-24                            | 1                                             |                |
| 25-30                           | 0.58 (0.22;1.53)                              | 0.270          |
| 31-49                           | 1.12(0.40;3.20)                               | 0.832          |
| <b>Education</b>                |                                               |                |
| Primary                         | 1                                             |                |
| ≥Secondary                      | 2.18 (1.01; 4.71)                             | 0.047          |
| <b>Routine medical check-up</b> |                                               |                |
| No                              |                                               |                |
| Yes                             | 0.88 (0.73; 1.05)                             | 0.167          |
| <b>Housing status</b>           |                                               |                |
| Own/rented house                | 1                                             |                |
| Housed by relatives/friends     | 0.37 (0.12; 1.13)                             | 0.081          |
| No shelter                      | 0.83 (0.06; 11.1)                             | 0.886          |

285  
286

## 287 **Discussion**

288 In this study we examined the extent to which HIV negative FSWs adhere to the testing guidelines by  
289 measuring the frequency of HIV testing in the year preceding the survey, and the associated factors.

290 The HIV testing guidelines in Uganda, indicate that FSWs should test every three months (5). However,  
291 in this study the researcher’s definition considers FSWs to have adhered to the testing guidelines if they  
292 tested for HIV at least three times in the last one year regardless of the interval.

293

294 On the assessment of testing frequencies as measure of adherence to the testing guidelines, the FSWs  
295 that had tested three or more times in the year preceding the study constituted 57%. This outcome is too  
296 low to meet the WHO recommendation of HIV testing at intervals of every three to six months among  
297 FSWs (3) and Uganda testing guidelines for FSWs of testing every three months (5) and far below to  
298 meet the updated UNAIDS 95-95-95 targets for epidemic control by 2025 which aim for 95% of those



299 living with HIV to know their status, 95% of those who know their status to be on treatment and 95%  
300 of those on treatment to be virally suppressed (34) . Previously, few studies have assessed frequencies  
301 of testing, and instead a lot has been reported on the recent testing outcome (26). With the introduction  
302 of self-testing, studies have reported a potential benefit of increasing the frequency of HIV testing  
303 among FSWs (35, 36) , this study therefore highlights a need for programs and studies to actively track  
304 complementary HIV testing outcomes including accessibility to HIV testing services, willingness to  
305 test and frequency of HIV testing among FSWs so that the data can be used for evidence based service  
306 delivery.

307

308 In this study we found that education was significantly associated with adherence to the HIV testing  
309 guidelines. This could be because individuals with secondary or higher education have increased  
310 capacity to interpret the guidelines, while those with primary level or no education at all could affect  
311 comprehension to understand but also to appreciate the benefits of testing for HIV on a routine basis.  
312 Other studies have reported similar findings although in different populations and study outcomes. For  
313 example, a study on HIV testing among adolescents in Uganda found that individuals who had  
314 secondary or higher education were more likely to have ever tested than those who had no education at  
315 all (37). Similarly, an analysis of demographic and healthy survey in Zambia found that higher  
316 education attainment was a strong predictor of uptake of HIV testing among women of child bearing  
317 age (38). This finding is not isolated for Sub-Saharan African countries, as similar findings have also  
318 been reported in America (39). This implies that less educated FSWs may not fully understand the HIV  
319 testing guidelines and realize the benefits of adhering by following the recommended testing  
320 frequencies of every three months. Therefore, health promotion models for HIV testing with messaging  
321 specifically packaged for FSWs with no formal or primary education may help increase adherence to  
322 the HIV testing guidelines for HIV negative FSWs. In addition, equipping health workers, FSWs peer  
323 leaders and community educators with skills to deliver messaging in a simplified way may go a long  
324 way to improve adherence to the HIV testing guidelines by FSWs. Further, Uganda has a behaviour  
325 change implementing partner supported by PEPFAR whose mandate is to develop communication  
326 messaging through mass media and print and to bridge the gap of service uptake and adoption of key

327 practices (33), therefore there is need for real-time monitoring for continuous program improvement  
328 and to continually refine understanding of what behaviour change communication models work, under  
329 what contextual circumstances. Re-evaluating the impact of the available messaging on adherence to  
330 testing guidelines by FSWs, including the extent of wide dissemination of information and the level of  
331 engagement of peers in information sharing and education is key. This helps to ascertain if there is need  
332 for revision in the way the messages are packaged and disseminated and if they suit the purpose to  
333 achieve optimal benefits.

334

335 Findings from this study show that FSWs who were staying with friends and relatives, compared to  
336 those who were renting houses on their own, were likely to have increased number of HIV tests in a  
337 year. Although non-significant, this finding supports previous reports of other studies about  
338 relationships between social support and increased uptake of HIV testing. In a systematic review on  
339 uptake of HIV testing and counselling among FSWs, it was found that FSWs who had a higher uptake  
340 of HIV testing are those who were married, had peers to remind them to test or were encouraged by  
341 employers (26) . Other studies (40, 41) have also shown that FSWs who have social support are likely  
342 to seek a range of health services such as condom use and other reproductive health services. The more  
343 the diverse sources of social support, the more the FSWs are likely to seek care including routine HIV  
344 testing. This underscores the need for strengthened programmatic and sustained peer to peer support  
345 among female sex workers, an intervention that has been proven to support increased access to HIV  
346 services among FSWs (14, 42) yet largely dependent on external funding with little funds allocation  
347 from governments (43) . As such, predictable program financing for sex work broader HIV prevention  
348 programs including financing community support systems and behaviour change communications  
349 where feasible, is a strong pillar for sustained support for FSWs HIV testing programs.

350

351 Similarly, this study found that FSWs who were conducting routine health check-up at health facilities  
352 and those who had tested for STI in the last three months preceding the survey showed improved  
353 adherence to the testing guidelines. This confirms findings from previous studies, that health seeking  
354 behaviour influences decisions to regularly take HIV tests since the testing services are mostly provided

355 in the hospitals (44, 45). WHO recommends that FSWs screen for STIs every three months (46).  
356 According to service delivery guidelines for key populations including FSWs in Uganda , FSWs who  
357 visit health facilities for various health needs and are identified to be practicing sex work should also  
358 be offered STI screening and provider initiated HIV testing (5). If this guidance was strictly followed  
359 by health workers, the results for this outcome would likely be reflected in the increased numbers of  
360 FSWs that are testing for HIV every three months as well as screening for STIs. However, due to stigma  
361 and discrimination by health workers, a barrier that was reported in this study and in other previous  
362 studies (47, 48) , FSWs may not freely self-identify to be practicing sex work and this might imply that  
363 there are missed opportunities of routinely testing FSWs whenever they visit health facilities to seek for  
364 their other health care needs.

365

366 In this study, use of drop-in centres to test for HIV had improved adherence to the testing guidelines,  
367 but the relationship was not significant. Due to health disparities and barriers to access HIV services  
368 including increased testing among FSW, WHO recommends setting up of safe spaces for FSWs that  
369 allows meaningful engagement of FSWs to determine their health priorities, and where appropriate,  
370 non-judgmental services can be provided (3). Previous studies have reported the impact of drop-in  
371 centres to increased access to HIV services including HIV testing in Uganda (9), Mozambique (49) and  
372 Malawi (50). However, drop-in centres have not been taken to scale, are scarce and therefore  
373 inaccessible to FSWs who would have otherwise desired to access HIV testing through DICs, an issue  
374 that was noted in this study. According to the PEPFAR report (unpublished, 2021), there are 46  
375 accredited DICs in all regions of Uganda, but Ministry of Health is making steps to increase the number  
376 of DICs and has since developed guidelines for establishing and operating DICs (51) to guide processes  
377 and the needed capacity required when setting up DICs. Setting up of various DICs in all districts of  
378 Uganda and supporting them to provide FSWs appropriate services will go a long way to improve  
379 availability of FSWs friendly testing services and thus improved adherence to the testing guidelines  
380 among FSWs.

381

382 FSWs in Uganda face various barriers that affect routine HIV testing which eventually affect adherence  
383 to the testing guidelines (9, 48). In this study barriers related to health system and individual challenges  
384 were reported including stigma and discrimination from health workers, costs associated with  
385 transportation, and the inflexibility of clinic opening hours that do not take into consideration FSWs  
386 work contexts. These findings are consistent with reports in other studies in Uganda and other countries  
387 in the region (7, 14, 52). Other barriers reported in this study were individual perceptions related to  
388 hesitancy to take routine tests because of fear to receive the news of HIV positive results and others  
389 perceived themselves at low risk because they were consistently using condoms and did not see the  
390 reason of routine testing. These barriers have for a long time been reported in many studies in Sub-  
391 Saharan Africa (26, 53-55) and they continue to be reported, an indication for consistent targeted health  
392 awareness education as well as to periodically evaluate health promotion campaigns and models of  
393 dissemination to ensure that concerns or the knowledge gaps of intended beneficiaries are addressed.

394

395 This study has several limitations. The questions in this study including the testing frequency history  
396 depended on self-report and this might have caused recall bias or biases related to social desirability,  
397 leading to internal validity of the findings. In addition, the eligibility to this study required that a  
398 participant is HIV negative, and we depended on self-disclosure of HIV positive status, we therefore  
399 cannot rule out possible false information of participants seropositivity status thus introducing  
400 measurement bias. However, this could be a minimal downside since we did not inform gate keepers  
401 about this eligibility criteria and had developed a pseudo short questionnaire that the research team  
402 would transition to whenever a participant disclosed their HIV positive status. Further, due to the cross-  
403 sectional nature of the study design, there is inability to draw causal relationships but rather to only  
404 determine associations. Lastly, in this study, we used convenience sampling, and this could have  
405 introduced selection bias. The findings from this study therefore need to be interpreted with caution.

#### 406 **Conclusion**

407 Based on the findings in this study, recommendations that may contribute to improved adherence to the  
408 testing guidelines by FSWs are those that increase the reach to testing services, intensity, and impact of  
409 behaviour change communication messaging targeting sex work especially those with lower education.

410 Attaining secondary education or better was associated with adherence to the testing guidelines. This  
411 calls for enhancement of awareness campaigns regarding HIV testing guidelines as a measure to  
412 improve HIV testing among FSWs. Also, there is need for programs to scale up interventions that aim  
413 to improve access to and frequency of HIV testing, for example self-testing programs need to be  
414 expanded to reach all FSWs. In addition, continuous, and greater use of real time program evaluation,  
415 to refine understanding of what behaviour change communication models work, under what contextual  
416 circumstances is very key. As such, evaluating the available HIV testing campaigns and ascertain that  
417 they adequately promote adherence to the testing guidelines and if need be, package the messages in a  
418 way that is easy to comprehend by FSWs with less education is paramount. Lastly, equipping health  
419 workers and FSWs peer leaders with skills to deliver messaging in a manner understandable by less  
420 educated FSWs may go a long way to improve adherence to the HIV testing guidelines by FSWs.

#### 421 **Acknowledgments**

422 We acknowledge Ms. Doreen Bakeiha and Ms. Florence Namimbi, the HIV Prevention advisors at  
423 Infectious Disease Institute who were the link to the network organisations and for availing us lists of  
424 all mapped hotspots in Kampala. We extend our appreciation to study participants, the network  
425 organisations and FSWs peers who supported us reach the participants for data collection. We thank  
426 the research assistants for ensuring quality data was collected.

#### 427 **Author contributions**

428 **Lydia Atuhaire**; Conceptualization, methodology development of interview tools, writing – original  
429 draft, writing – review & editing. **Constance S Shumba**; Review of interview tools, methodology,  
430 writing review and editing. **Innocent Maposa and Lovemore Mapahla**; Formal analysis,  
431 methodology, writing – review & editing; **Peter S Nyasulu**; Review of interview tools, methodology,  
432 writing-review and editing. **All authors**; Read and approved the final manuscript

#### 433 **Funding**

434 The authors did not receive funding support from any organization for the submitted work.

#### 435 **Data availability**

436 Due to conditions of ethical approvals of research among key populations, we are unable to provide  
437 access to the full dataset on a public repository. However, we are willing to de-identify transcripts and  
438 make them available upon reasonable request. Interested persons should contact the corresponding  
439 author.

440

## 441 **References**

- 442 1. World Health Organisation. Consolidated guidelines on the use of antiretroviral drugs for  
443 treating and preventing HIV infection: recommendations for a public health approach – 2nd ed.  
444 Geneva 2016.
- 445 2. World Health Organization. Differentiated Service Delivery for HIV: A Decision Framework  
446 for HIV Testing Services. Geneva. 2018.
- 447 3. World Health Organization. Consolidated guidelines on HIV prevention, diagnosis, treatment  
448 and care for key populations: Geneva, Switzerland; 2016.
- 449 4. Macdonald V, Verster A, Baggaley R. A call for differentiated approaches to delivering HIV  
450 services to key populations. *Journal of the International AIDS Society*. 2017;20:21658.
- 451 5. Ministry of Health. Toolkit for Differentiated HIV and other Services Delivery Models for  
452 Key Populations in Uganda. 2019.
- 453 6. Ministry of Health. National HIV Testing Services Policy and Implementation Guidelines.  
454 Ministry of Health of Uganda; 2016.
- 455 7. Wanyenze RK, Musinguzi G, Kiguli J, Nuwaha F, Mujisha G, Musinguzi J, et al. “When they  
456 know that you are a sex worker, you will be the last person to be treated”: Perceptions and  
457 experiences of female sex workers in accessing HIV services in Uganda. 2017;17(1):11.
- 458 8. Narasimhan M, Yeh PT, Haberlen S, Warren CE, Kennedy CE. Integration of HIV testing  
459 services into family planning services: a systematic review. *Reproductive health*. 2019;16(1):1-12.
- 460 9. Pande G, Bulage L, Kabwama S, Nsubuga F, Kyambadde P, Mugerwa S, et al. Preference  
461 and uptake of different community-based HIV testing service delivery models among female sex  
462 workers along Malaba-Kampala highway, Uganda, 2017. *BMC Health Services Research*.  
463 2019;19(1):1-11.

- 464 10. Mulongo S, Kapila G, Hatton T, Canagasabey D, Arney J, Kazadi T, et al. Applying  
465 innovative approaches for reaching men who have sex with men and female sex workers in the  
466 Democratic Republic of Congo. *JAIDS Journal of Acquired Immune Deficiency Syndromes*.  
467 2015;68:S248-S51.
- 468 11. Ma H, Wang L, Gichangi P, Mochache V, Manguro G, Musyoki HK, et al. Venue-based HIV  
469 testing at sex work hotspots to reach adolescent girls and young women living with HIV: a cross-  
470 sectional study in Mombasa, Kenya. *Journal of acquired immune deficiency syndromes (1999)*.  
471 2020;84(5):470.
- 472 12. Bassett IV, Regan S, Mbonambi H, Blossom J, Bogan S, Bearnot B, et al. Finding HIV in  
473 hard to reach populations: mobile HIV testing and geospatial mapping in Umlazi township, Durban,  
474 South Africa. *AIDS and Behavior*. 2015;19(10):1888-95.
- 475 13. Cowan FM, Chabata ST, Musemburi S, Fearon E, Davey C, Ndori-Mharadze T, et al.  
476 Strengthening the scale-up and uptake of effective interventions for sex workers for population impact  
477 in Zimbabwe. *Journal of the International AIDS Society*. 2019;22:e25320.
- 478 14. Atuhaire L, Adetokunboh O, Shumba C, Nyasulu PS. Effect of community-based  
479 interventions targeting female sex workers along the HIV care cascade in sub-Saharan Africa: a  
480 systematic review and meta-analysis. *Systematic Reviews*. 2021;10(1):1-20.
- 481 15. Kelvin EA, George G, Mwai E, Kinyanjui S, Romo ML, Odhiambo JO, et al. A randomized  
482 controlled trial to increase HIV testing demand among female sex workers in Kenya through  
483 announcing the availability of HIV self-testing via text message. *AIDS and Behavior*.  
484 2019;23(1):116-25.
- 485 16. Ndori-Mharadze T, Fearon E, Busza J, Dirawo J, Musemburi S, Davey C, et al. Changes in  
486 engagement in HIV prevention and care services among female sex workers during intensified  
487 community mobilization in 3 sites in Zimbabwe, 2011 to 2015. *Journal of the International AIDS  
488 Society*. 2018;21:e25138.
- 489 17. Wulandari LPL, Kaldor J, Januraga PP. High condom use but low HIV testing uptake  
490 reported by men who purchase sex in Bali, Indonesia. *AIDS Care*. 2018;30(10):1215-22.



- 491 18. Deering KN, Montaner J, Chettiar J, Jia J, Ogilvie G, Buchner C, et al. Successes and gaps in  
492 uptake of regular, voluntary HIV testing for hidden street-and off-street sex workers in Vancouver,  
493 Canada. *AIDS Care*. 2015;27(4):499-506.
- 494 19. Batona G, Gagnon M-P, Simonyan DA, Guedou FA, Alary M. Understanding the intention to  
495 undergo regular HIV testing among female sex workers in Benin: a key issue for entry into HIV care.  
496 *JAIDS Journal of Acquired Immune Deficiency Syndromes*. 2015;68:S206-S12.
- 497 20. Bengtson AM, L'Engle K, Mwarogo P, King'ola N. Levels of alcohol use and history of HIV  
498 testing among female sex workers in Mombasa, Kenya. *AIDS Care*. 2014;26(12):1619-24.
- 499 21. Setlhare K, Manyeagae GD. Factors associated with HIV testing among female sex workers  
500 in Botswana. *Journal of AIDS and HIV Research*. 2017;9(2):42-51.
- 501 22. Hladik W BA, Serwadda D, Tappero JW, Kwezi, R, Namakula DK, et al. Burden and  
502 characteristics of HIV infection among female sex workers in Kampala, Uganda—a respondent-driven  
503 sampling survey. *BMC Public Health*. 2017;17(1):565.
- 504 23. Muhindo R, Castelnovo B, Mujugira A, Parkes-Ratanshi R, Sewankambo NK, Kiguli J, et  
505 al. Psychosocial correlates of regular syphilis and HIV screening practices among female sex workers  
506 in Uganda: a cross-sectional survey. *AIDS Research and Therapy*. 2019;16(1):1-9.
- 507 24. Martins TA, Kerr L, Macena RHM, Mota RS, Dourado I, Brito AMd, et al. Incentivos e  
508 barreiras ao teste de HIV entre mulheres profissionais do sexo no Ceará. *Revista de Saúde Pública*.  
509 2018;52:64.
- 510 25. Damacena GN, Szwarcwald CL, de Souza Júnior PR, Dourado I. Risk factors associated with  
511 HIV prevalence among female sex workers in 10 Brazilian cities. *JAIDS Journal of Acquired Immune*  
512 *Deficiency Syndromes*. 2011;57:S144-S52.
- 513 26. Tokar A, Broerse JE, Blanchard J, Roura M. HIV testing and counseling among female sex  
514 workers: a systematic literature review. *AIDS and Behavior*. 2018;22(8):2435-57.
- 515 27. Decker MR, Wirtz AL, Pretorius C, Sherman SG, Sweat MD, Baral SD, et al. Estimating the  
516 impact of reducing violence against female sex workers on HIV epidemics in Kenya and Ukraine: a  
517 policy modeling exercise. *American Journal of Reproductive Immunology*. 2013;69:122-32.



- 518 28. Nyblade L, Reddy A, Mbote D, Kraemer J, Stockton M, Kemunto C, et al. The relationship  
519 between health worker stigma and uptake of HIV counseling and testing and utilization of non-HIV  
520 health services: the experience of male and female sex workers in Kenya. *AIDS Care*.  
521 2017;29(11):1364-72.
- 522 29. Lillie TA, Persaud NE, DiCarlo MC, Gashobotse D, Kamali DR, Cheron M, et al. Reaching  
523 the unreached: performance of an enhanced peer outreach approach to identify new HIV cases among  
524 female sex workers and men who have sex with men in HIV programs in West and Central Africa.  
525 *PloS One*. 2019;14(4):e0213743.
- 526 30. Olawore O, Astatke H, Lillie T, Persaud N, Lyons C, Kamali D, et al. Peer Recruitment  
527 Strategies for Female Sex Workers Not Engaged in HIV Prevention and Treatment Services in Côte  
528 d'Ivoire: Program Data Analysis. *JMIR public health and surveillance*. 2020;6(4):e18000.
- 529 31. Shokoohi M, Noori A, Karamouzian M, Sharifi H, Khajehkazemi R, Fahimfar N, et al.  
530 Remaining gap in HIV testing uptake among female sex workers in Iran. *AIDS and Behavior*.  
531 2017;21(8):2401-11.
- 532 32. Van Bulck L, Wampers M, Moons P. Research Electronic Data Capture (REDCap): tackling  
533 data collection, management, storage, and privacy challenges. *European Journal of Cardiovascular*  
534 *Nursing*. 2021.
- 535 33. FHI 360. Social and behavior change communication in Uganda. Providing strategic support  
536 to improve health program outcomes 2020.
- 537 34. UNAIDS. 2030-Ending the AIDS Epidemic, the 2025 AIDS Targets.  
538 [https://www.unaids.org/sites/default/files/2025-AIDS-Targets\\_enpdf](https://www.unaids.org/sites/default/files/2025-AIDS-Targets_enpdf) Accessed December 27, 2021.  
539 2021.
- 540 35. Wang C, Wang Y-J, Tucker JD, Xiong M-Z, Fu H-Y, Smith MK, et al. Correlates of HIV  
541 self-testing among female sex workers in China: implications for expanding HIV screening. *Infectious*  
542 *diseases of poverty*. 2020;9(1):1-9.
- 543 36. Shava E, Manyake K, Mdluli C, Maribe K, Monnapula N, Nkomo B, et al. Acceptability of  
544 oral HIV self-testing among female sex workers in Gaborone, Botswana. *PloS One*.  
545 2020;15(7):e0236052.

- 546 37. Purba FD, Hunfeld JA, Fitriana TS, Iskandarsyah A, Sadarjoen SS, Busschbach JJ, et al.  
547 Living in uncertainty due to floods and pollution: the health status and quality of life of people living  
548 on an unhealthy riverbank. *BMC Public Health*. 2018;18(1):1-11.
- 549 38. Muyunda B, Musonda P, Mee P, Todd J, Michelo C. Educational attainment as a predictor of  
550 HIV testing uptake among women of child-bearing age: analysis of 2014 demographic and health  
551 survey in Zambia. *Frontiers in public health*. 2018;6:192.
- 552 39. Onyeabor OS, Iriemenam N, Adekeye OA, Rachel SA. The effect of educational attainment  
553 on HIV testing among African Americans. *Journal of Health Care for the Poor and Underserved*.  
554 2013;24(3):1247-56.
- 555 40. Qiao S, Li X, Zhang C, Zhou Y, Shen Z, Tang Z. Social support and condom use among  
556 female sex workers in China. *Health Care for Women International*. 2015;36(7):834-50.
- 557 41. Mizinduko M, Moen K, Pinkowski Tersbøl B, Likindikoki SL, Alexander Ishungisa M,  
558 Leyna GH, et al. HIV testing and associated factors among female sex workers in Tanzania:  
559 approaching the first 90% target? *AIDS Care*. 2021:1-9.
- 560 42. Nnko S KE, Nyato D, Drake M, Casalini C, Shao A, Komba A, Baral S, Wambura M,  
561 Changalucha J. Determinants of access to HIV testing and counselling services among female sex  
562 workers in sub-Saharan Africa: a systematic review. *BMC Public Health*. 2019;19(1):15.
- 563 43. Kerrigan D, Kennedy CE, Morgan-Thomas R, Reza-Paul S, Mwangi P, Win KT, et al. A  
564 community empowerment approach to the HIV response among sex workers: effectiveness,  
565 challenges, and considerations for implementation and scale-up. *The Lancet*. 2015;385(9963):172-85.
- 566 44. Musekiwa A, Bamogo A, Shisana O, Robsky K, Zuma K, Zungu NP, et al. Prevalence of self-  
567 reported HIV testing and associated factors among adolescent girls and young women in South  
568 Africa: results from a 2017 nationally representative population-based HIV survey. *Public Health in  
569 Practice*. 2021;2:100093.
- 570 45. Nangendo J, Katahoire AR, Armstrong-Hough M, Kabami J, Obeng-Amoako GO, Muwema  
571 M, et al. Prevalence, associated factors and perspectives of HIV testing among men in Uganda. *PloS  
572 One*. 2020;15(8):e0237402.

- 573 46. World Health Organization. Global health sector strategy on sexually transmitted infections  
574 2016-2021: towards ending STIs. World Health Organization; 2016.
- 575 47. Nakanwagi S, Matovu JK, Kintu BN, Kaharuza F, Wanyenze RK. Facilitators and barriers to  
576 linkage to hiv care among female sex workers receiving hiv testing services at a community-based  
577 organization in Periurban Uganda: A Qualitative Study. *Journal of sexually transmitted diseases*.  
578 2016;2016.
- 579 48. Wanyenze RK, Musinguzi G, Kiguli J, Nuwaha F, Mujisha G, Musinguzi J, et al. “When they  
580 know that you are a sex worker, you will be the last person to be treated”: perceptions and experiences  
581 of female sex workers in accessing HIV services in Uganda. *BMC International Health and Human  
582 Rights*. 2017;17(1):1-11.
- 583 49. Lafort Y, Geelhoed D, Cumba L, Lázaro CdDM, Delva W, Luchters S, et al. Reproductive  
584 health services for populations at high risk of HIV: Performance of a night clinic in Tete province,  
585 Mozambique. *BMC Health Services Research*. 2010;10(1):1-9.
- 586 50. Vu L, Zieman B, Muula A, Samuel V, Tenthani L, Chilongozi D, et al. Assessment of  
587 community-based ART service model linking female sex workers to HIV care and treatment in  
588 Blantyre and Mangochi, Malawi. 2021.
- 589 51. Ministry of Health. Guidelines for establishing and operating drop-in centres for key  
590 populations in Uganda 2020.
- 591 52. Lafort Y, Greener L, Lessitala F, Chabeda S, Greener R, Beksinska M, et al. Effect of a  
592 ‘diagonal’ intervention on uptake of HIV and reproductive health services by female sex workers in  
593 three sub-Saharan African cities. *Tropical Medicine and International Health*. 2018;23(7):774-84.
- 594 53. Aho J, Nguyen VK, Diakité S, Sow A, Koushik A, Rashed S. High acceptability of HIV  
595 voluntary counselling and testing among female sex workers: impact of individual and social factors.  
596 *HIV Medicine*. 2012;13(3):156-65.
- 597 54. Ameyan W, Jeffery C, Negash K, Biruk E, Taegtmeier M. Attracting female sex workers to  
598 HIV testing and counselling in Ethiopia: a qualitative study with sex workers in Addis Ababa. *African  
599 Journal of AIDS Research*. 2015;14(2):137-44.

600 55. Chanda MM, Perez-Brumer AG, Ortblad KF, Mwale M, Chongo S, Kamungoma N, et al.

601 Barriers and facilitators to HIV testing among Zambian female sex workers in three transit hubs.

602 AIDS Patient Care and STDS. 2017;31(7):290-6.

603
